# Supplementary material for: Improving the Understanding of Pathogenesis of Human Papillomavirus 16 via Mapping Protein-Protein Interaction Network
Source: Hindawi journal article supplement (doi:10.1155/2015/890381), 2015-01-01
Supplement: f1 [file 890381.f1.pdf]

Table S1. List of the positive training set

| HPV16 | HUMAN PROTEIN | HPV16 | HUMAN PROTEIN |
|-------|---------------|-------|---------------|
| L1    | O00410        | E7    | O00716        |
| L1    | P11142        | E7    | O15304        |
| L1    | P52292        | E7    | O43586        |
| L1    | Q14974        | E7    | O96020        |
| L1    | Q92973        | E7    | P01100        |
| L2    | O00410        | E7    | P01106        |
| L2    | O00754        | E7    | P05412        |
| L2    | P48029        | E7    | P06400        |
| L2    | P52292        | E7    | P06493        |
| L2    | Q14974        | E7    | P07437        |
| L2    | Q15831        | E7    | P07900        |
| L2    | Q8TAE8        | E7    | P08246        |
| L2    | Q92973        | E7    | P08686        |
| L2    | Q92993        | E7    | P10914        |
| L2    | Q96EK4        | E7    | P14618        |
| L2    | Q99471        | E7    | P17174        |
| L2    | Q9GZM7        | E7    | P17275        |
| L2    | Q9HBE1        | E7    | P17535        |
| L2    | Q9Y679        | E7    | P17936        |
| E1    | P63279        | E7    | P20226        |
| E1    | Q12959        | E7    | P20248        |
| E1    | Q15645        | E7    | P21980        |
| E2    | O14617        | E7    | P22392        |
| E2    | O60885        | E7    | P24864        |
| E2    | P04637        | E7    | P24941        |
| E2    | P11387        | E7    | P28749        |
| E2    | P17676        | E7    | P30153        |
| E2    | P20226        | E7    | P30512        |
| E2    | P21675        | E7    | P30532        |
| E2    | P22736        | E7    | P30740        |
| E2    | P31274        | E7    | P36955        |
| E2    | P49715        | E7    | P38398        |
| E2    | P54368        | E7    | P38936        |
| E2    | P56537        | E7    | P46527        |
| E2    | P63244        | E7    | P49411        |
| E2    | P82094        | E7    | P51784        |
| E2    | Q00403        | E7    | P62191        |
| E2    | Q15637        | E7    | P62826        |
| E2    | Q16637        | E7    | P62851        |
| E2    | Q8TD31        | E7    | P63279        |

| HPV16 | HUMAN PROTEIN | HPV16 | HUMAN PROTEIN |
|-------|---------------|-------|---------------|
| E2    | Q92547        | E7    | P67775        |
| E2    | Q92831        | E7    | P68032        |
| E2    | Q99966        | E7    | P68400        |
| E2    | Q9BX70        | E7    | P78396        |
| E2    | Q9H0C5        | E7    | P98082        |
| E2    | Q9Y244        | E7    | Q00978        |
| E2    | Q9Y570        | E7    | Q01094        |
| E6    | O00220        | E7    | Q01860        |
| E6    | O14907        | E7    | Q08050        |
| E6    | O15350        | E7    | Q08999        |
| E6    | O43166        | E7    | Q09472        |
| E6    | P01106        | E7    | Q13309        |
| E6    | P04198        | E7    | Q13426        |
| E6    | P04637        | E7    | Q13478        |
| E6    | P10914        | E7    | Q13547        |
| E6    | P18887        | E7    | Q13573        |
| E6    | P19438        | E7    | Q13616        |
| E6    | P23142        | E7    | Q14186        |
| E6    | P26045        | E7    | Q14188        |
| E6    | P33993        | E7    | Q14209        |
| E6    | P38398        | E7    | Q14839        |
| E6    | P49023        | E7    | Q14978        |
| E6    | P49815        | E7    | Q16254        |
| E6    | P52292        | E7    | Q4G0J3        |
| E6    | P78352        | E7    | Q5T4S7        |
| E6    | Q05086        | E7    | Q7L099        |
| E6    | Q09472        | E7    | Q92769        |
| E6    | Q12959        | E7    | Q92793        |
| E6    | Q12986        | E7    | Q92831        |
| E6    | Q13158        | E7    | Q96CA5        |
| E6    | Q13227        | E7    | Q96EY1        |
| E6    | Q13478        | E7    | Q96RI1        |
| E6    | Q14160        | E7    | Q96TC7        |
| E6    | Q14257        | E7    | Q9BZX2        |
| E6    | Q14653        | E7    | Q9NVX7        |
| E6    | Q14974        | E7    | Q9Y3A3        |
| E6    | Q16512        | E7    | Q9Y3D9        |
| E6    | Q16611        | E7    | Q9Y3Z3        |
| E6    | Q92793        | E4    | Q96SB4        |
| E6    | Q92973        | E5    | O00410        |
| E6    | Q96JN8        | E5    | P00533        |
| E6    | Q96QZ7        | E5    | P04626        |

| HPV16 | HUMAN PROTEIN | HPV16 | HUMAN PROTEIN |
|-------|---------------|-------|---------------|
| E6    | Q9HD26        | E5    | P07333        |
| E6    | Q9P0J0        | E5    | P09619        |
| E6    | Q9UHV2        | E5    | P30443        |
| E7    | O00268        | E5    | P30455        |
| E7    | O00602        | E5    | P51572        |

Table S2. List of the positive test set

| HPV16 | Targeted protein/gene description                        | PMID                             |
|-------|----------------------------------------------------------|----------------------------------|
| E1    | p70                                                      | 9696837                          |
| E1    | TRIP13                                                   | 9223484                          |
| E2    | Androgenreceptor                                         | 17092759                         |
| E2    | Cell division cycle protein 20 homolog                   | 16222116                         |
| E2    | CASP8 and FADD-like apoptosis regulator                  | 20882347                         |
| E2    | Cleavage and polyadenylation specificity factor subunit4 | 22617423                         |
| E2    | Probable ATP-dependent RNA helicase DDX11                | 17189189                         |
| E2    | E1A-binding protein p400                                 | 20133580                         |
| E2    | Fizzy-related protein homolog                            | 16222116                         |
| E2    | Glutamate receptor-interacting protein 1                 | 17376404                         |
| E2    | Kinesin-like protein KIF20A                              | 23341853<br>22761572<br>17135315 |
| E2    | Importin subunit alpha-3                                 | 20193720                         |
| E2    | Importin subunit alpha-6                                 | 20193720                         |
| E2    | E3 ubiquitin-protein ligase Mdm2                         | 19004934                         |
| E2    | Nuclear receptor-interacting protein 1                   | 22177699                         |
| E2    | hSNF5                                                    | 20829602                         |
| E2    | Serine/arginine-rich splicing factor 1                   | 19187948                         |
| E2    | Serine/arginine-rich splicing factor 5                   | 19187948                         |
| E2    | Tax1-binding protein 1                                   | 19109394                         |
| E2    | UBC9                                                     | 18619639                         |
| E2    | Sp1                                                      | 8083979                          |
| E2    | P300                                                     | 10982355                         |
| E4    | keratin18                                                | 14694114                         |
| E4    | Cdk1                                                     | 12208959                         |
| E4    | CyclinB                                                  |                                  |
| E4    | Cdk2                                                     | 16540140                         |
| E4    | CyclinA                                                  |                                  |
| E4    | p42 MAPK                                                 | 19211765                         |
| E4    | TopBP1                                                   | 17287259                         |
| E5    | Endothelin-1 receptor                                    | 23731971                         |
| E5    | Calnexin                                                 |                                  |
| E5    | c-jun                                                    |                                  |
| E5    | c-fos                                                    |                                  |
| E5    | ErbB4                                                    |                                  |
| E5    | Phospholipase C- $\gamma$ 1                              |                                  |
| E5    | p27                                                      |                                  |
| E5    | p21                                                      |                                  |
| E5    | Bax                                                      |                                  |

| <b>HPV16</b> | <b>Targeted protein/gene description</b> | <b>PMID</b> |
|--------------|------------------------------------------|-------------|
| E5           | Bcl-2                                    | 23731971    |
| E5           | Fas                                      |             |
| E5           | Connexin 43                              |             |
| E5           | 16Kvacuolar-ATPasesubunit                |             |
| E5           | c-Cbl                                    |             |
| E5           | ERK1                                     |             |
| E5           | ERK2                                     |             |
| E5           | CD1d                                     |             |
| E5           | Cyclo-oxygenase-2                        |             |
| E5           | ABCC1                                    |             |
| E5           | AMFR                                     |             |
| E5           | APOB                                     |             |
| E5           | ATAD3A                                   |             |
| E5           | ATP1A1                                   |             |
| E5           | ATP2A2                                   |             |
| E5           | ATP2B4                                   |             |
| E5           | ATP5J                                    |             |
| E5           | ATP5O                                    |             |
| E5           | ATP6                                     |             |
| E5           | C20orf3                                  |             |
| E5           | CAV1                                     |             |
| E5           | CD44                                     |             |
| E5           | CHRM2                                    |             |
| E5           | COPA                                     |             |
| E5           | COX2                                     |             |
| E5           | CPT1A                                    |             |
| E5           | CSPG4                                    |             |
| E5           | DAD1                                     |             |
| E5           | DDOST                                    |             |
| E5           | EMD                                      |             |
| E5           | F2R                                      |             |
| E5           | FAF2                                     |             |
| E5           | GPAA1                                    |             |
| E5           | HM13                                     |             |
| E5           | IFITM3                                   |             |
| E5           | IGF2R                                    |             |
| E5           | ITGB1                                    |             |
| E5           | MAVS                                     |             |
| E5           | MBOAT7                                   |             |
| E5           | MLEC                                     |             |
| E5           | MMP14                                    |             |

| <b>HPV16</b> | <b>Targeted protein/gene description</b> | <b>PMID</b> |
|--------------|------------------------------------------|-------------|
| E5           | NDUFA4                                   | 22810586    |
| E5           | PDIA3                                    |             |
| E5           | PHB2                                     |             |
| E5           | PIGK                                     |             |
| E5           | PIGS                                     |             |
| E5           | PIGT                                     |             |
| E5           | PIGU                                     |             |
| E5           | PKD2                                     |             |
| E5           | PLD3                                     |             |
| E5           | PON2                                     |             |
| E5           | PRAF2                                    |             |
| E5           | PTPLAD1                                  |             |
| E5           | PTPN1                                    |             |
| E5           | PTRF                                     |             |
| E5           | QPCTL                                    |             |
| E5           | RAB18                                    |             |
| E5           | RABAC1                                   |             |
| E5           | REEP5                                    |             |
| E5           | RPL13A                                   |             |
| E5           | RPL21                                    |             |
| E5           | RPN2                                     |             |
| E5           | RTN4                                     |             |
| E5           | S100A13                                  |             |
| E5           | SEC11A                                   |             |
| E5           | SEC61B                                   |             |
| E5           | SEC62                                    |             |
| E5           | SERPINE2                                 |             |
| E5           | SLC1A5                                   |             |
| E5           | SLC2A1                                   |             |
| E5           | SLC3A2                                   |             |
| E5           | SPNS1                                    |             |
| E5           | SQRDL                                    |             |
| E5           | SRPRB                                    |             |
| E5           | SSR3                                     |             |
| E5           | SSR4                                     |             |
| E5           | STOM                                     |             |
| E5           | STT3A                                    |             |
| E5           | SURF4                                    |             |
| E5           | TAP1                                     |             |
| E5           | TAPBP                                    |             |
| E5           | TMEM33                                   |             |

| <b>HPV16</b> | <b>Targeted protein/gene description</b> | <b>PMID</b> |
|--------------|------------------------------------------|-------------|
| E5           | TMEM66                                   | 22810586    |
| E5           | TMPO                                     |             |
| E5           | TRAM1                                    |             |
| E5           | TRPV4                                    |             |
| E5           | VKORC1                                   |             |
| E6           | TADA3                                    | 12235159    |
| E6           | USP15                                    | 23015706    |
| E6           | CYLD                                     | 18977328    |
| E6           | BARD1                                    | 17678435    |
| E6           | TIP-2                                    | 15767424    |
| E6           | GADD34/PP1                               | 15060162    |
| E6           | MUPPI                                    | 11000240    |
| E6           | PKA C-alpha                              | 11127819    |
| E6           | ATF3                                     | 20167600    |
| E6           | PKA C-beta                               | 11127819    |
| E6           | PML-IV                                   | 15107834    |
| E6           | TYK2                                     | 10523853    |
| E6           | UBC9                                     | 21510985    |
| E6           | SMAD3                                    | 17020941    |
| E6           | Procaspase 8                             | 17267478    |
| E6           | Zyxin                                    | 11689660    |
| E6           | PKN                                      | 10809724    |
| E6           | MAGI-2                                   | 11571640    |
| E6           | CARM1                                    | 21963854    |
| E6           | PIASy                                    | 16793547    |
| E6           | PATJ                                     | 17287269    |
| E6           | MAML1                                    | 22249263    |
| E6           | PRMT1                                    | 21963854    |
| E6           | HIPK2                                    | 22110707    |
| E6           | TERT                                     | 19843693    |
| E6           | HERC2                                    | 19553310    |
| E6           | MAGI-3                                   | 15378012    |
| E6           | PKN                                      | 10809724    |
| E6           | SET7                                     | 21963854    |
| E6           | COL6A2                                   | 22810586    |
| E6           | PDZRN3                                   |             |
| E6           | PSMA1                                    |             |
| E6           | PSMA4                                    |             |
| E6           | PSMA6                                    |             |
| E6           | PSMB1                                    |             |
| E6           | PSMB2                                    |             |

| <b>HPV16</b> | <b>Targeted protein/gene description</b> | <b>PMID</b>          |
|--------------|------------------------------------------|----------------------|
| E6           | PSMC1                                    | 22810586             |
| E6           | PSMC2                                    |                      |
| E6           | PSMC3                                    |                      |
| E6           | PSMC4                                    |                      |
| E6           | PSMC5                                    |                      |
| E6           | PSMC6                                    |                      |
| E6           | PSMD1                                    |                      |
| E6           | PSMD11                                   |                      |
| E6           | PSMD12                                   |                      |
| E6           | PSMD13                                   |                      |
| E6           | PSMD14                                   |                      |
| E6           | PSMD3                                    |                      |
| E6           | PSMD4                                    |                      |
| E6           | PSMD7                                    |                      |
| E6           | PSMD8                                    |                      |
| E6           | RPL13A                                   |                      |
| E6           | SRRM2                                    |                      |
| E6           | UBR5                                     |                      |
| E7           | CAPN1                                    | 17977825             |
| E7           | CENPC                                    | 22890155             |
| E7           | CHUK                                     | 11986318             |
| E7           | CUL2                                     | 17609271             |
| E7           | CUL3                                     | 22232672             |
| E7           | DYRK1A                                   | 18468476             |
| E7           | FHL2                                     | 17093190             |
| E7           | HIF1A                                    | 21148070             |
| E7           | NCOA1                                    | 16775354             |
| E7           | NUMA1                                    | 19052088             |
| E7           | PML                                      | 15657429             |
| E7           | SMAD1                                    | 16710631<br>12145312 |
| E7           | SMAD2                                    |                      |
| E7           | SMAD3                                    |                      |
| E7           | SMAD4                                    |                      |
| E7           | SMARCA4                                  | 12372840             |
| E7           | TAF1C                                    | 7478615              |
| E7           | TAP1                                     | 11580231             |
| E7           | ZBTB17                                   | 22099967             |
| E7           | KDM1A                                    | 15016876             |
| E7           | IKAPPAB KINASE COMPLEX                   | 11986318             |
| E7           | ATPase of the 26 S proteasome            | 9374493              |
| E7           | TBG1                                     | 17913829             |



| <b>HPV16</b> | <b>Targeted protein/gene description</b> | <b>PMID</b> |
|--------------|------------------------------------------|-------------|
| E7           | E2F6                                     | 18579589    |
| E7           | GSTP1                                    | 19826491    |
| E7           | NME1                                     | 17103045    |
| E7           | HTRA1                                    | 21148070    |
| E7           | AES                                      | 22810586    |
| E7           | AP2A1                                    |             |
| E7           | AP2M1                                    |             |
| E7           | ARHGAP35                                 |             |
| E7           | BEND7                                    |             |
| E7           | BYSL                                     |             |
| E7           | CCND3                                    |             |
| E7           | CDK4                                     |             |
| E7           | CDK5                                     |             |
| E7           | CLK2                                     |             |
| E7           | CNP                                      |             |
| E7           | E2F5                                     |             |
| E7           | FAM164C                                  |             |
| E7           | JAK1                                     |             |
| E7           | KIAA1377                                 |             |
| E7           | LMO2                                     |             |
| E7           | PCNA                                     |             |
| E7           | PIN4                                     |             |
| E7           | POLR1C                                   |             |
| E7           | PRKAA2                                   |             |
| E7           | PSMC2                                    |             |
| E7           | PTPN14                                   |             |
| E7           | PTPN21                                   |             |
| E7           | REL                                      |             |
| E7           | RPL9                                     |             |
| E7           | SQRDL                                    |             |
| E7           | SRP19                                    |             |
| E7           | SRRM2                                    |             |
| E7           | SYT16                                    |             |
| E7           | TCEB1                                    |             |
| E7           | TCEB2                                    |             |
| E7           | TEAD4                                    |             |
| E7           | TXNDC5                                   |             |
| E7           | ZBTB25                                   |             |
| E7           | ZGPAT                                    |             |
| E7           | ZNF408                                   |             |
| E7           | ZNF417                                   |             |

| <b>HPV16</b> | <b>Targeted protein/gene description</b> | <b>PMID</b>          |
|--------------|------------------------------------------|----------------------|
| L1           | CyPB                                     | 19629175             |
| L1           | Syndecan-1                               | 19878308<br>23601855 |
| L1           | Syndecan-2                               |                      |
| L1           | HSPG                                     |                      |
| L2           | CyPB                                     | 19629175             |
| L2           | SNX17                                    | 22151726             |
| L2           | HSC70                                    | 15140951             |
| L2           | DYNLT1                                   | 21166973             |
| L2           | DYNLT3                                   |                      |
| L2           | FURIN                                    | 24816794             |

Table S3. List of the all set

| HPV16 | HUMAN PROTEIN | HPV16 | HUMAN PROTEIN |
|-------|---------------|-------|---------------|
| L1    | O95757        | E7    | P08134        |
| L1    | P08107        | E7    | P08235        |
| L1    | P11142        | E7    | P08238        |
| L1    | P23284        | E7    | P08246        |
| L1    | P34741        | E7    | P08572        |
| L1    | P52292        | E7    | P09211        |
| L1    | P52294        | E7    | P09543        |
| L1    | Q14974        | E7    | P10275        |
| L1    | Q92598        | E7    | P10301        |
| L2    | O00141        | E7    | P10827        |
| L2    | O00505        | E7    | P10828        |
| L2    | O00754        | E7    | P10914        |
| L2    | O14757        | E7    | P11473        |
| L2    | O43318        | E7    | P11802        |
| L2    | O75914        | E7    | P12004        |
| L2    | O75962        | E7    | P12931        |
| L2    | O95251        | E7    | P13747        |
| L2    | P00519        | E7    | P13762        |
| L2    | P05129        | E7    | P14618        |
| L2    | P05771        | E7    | P14625        |
| L2    | P06493        | E7    | P14859        |
| L2    | P07711        | E7    | P15153        |
| L2    | P07858        | E7    | P15336        |
| L2    | P09958        | E7    | P15531        |
| L2    | P10074        | E7    | P16591        |
| L2    | P10398        | E7    | P17275        |
| L2    | P11142        | E7    | P17535        |
| L2    | P11802        | E7    | P17612        |
| L2    | P15622        | E7    | P17936        |
| L2    | P17612        | E7    | P19525        |
| L2    | P21127        | E7    | P19784        |
| L2    | P22694        | E7    | P19793        |
| L2    | P23284        | E7    | P20226        |
| L2    | P23458        | E7    | P20337        |
| L2    | P24941        | E7    | P21127        |
| L2    | P25774        | E7    | P21675        |
| L2    | P27361        | E7    | P21980        |
| L2    | P28482        | E7    | P22392        |
| L2    | P31751        | E7    | P22694        |
| L2    | P41743        | E7    | P22736        |

| HPV16 | HUMAN PROTEIN | HPV16 | HUMAN PROTEIN |
|-------|---------------|-------|---------------|
| L2    | P42684        | E7    | P23258        |
| L2    | P45983        | E7    | P23458        |
| L2    | P45984        | E7    | P24593        |
| L2    | P48029        | E7    | P24821        |
| L2    | P49137        | E7    | P24941        |
| L2    | P49840        | E7    | P25098        |
| L2    | P49841        | E7    | P27361        |
| L2    | P50613        | E7    | P28482        |
| L2    | P51955        | E7    | P28749        |
| L2    | P52292        | E7    | P29375        |
| L2    | P52294        | E7    | P29590        |
| L2    | P53667        | E7    | P30281        |
| L2    | P63172        | E7    | P30511        |
| L2    | Q00535        | E7    | P30532        |
| L2    | Q00536        | E7    | P30740        |
| L2    | Q04759        | E7    | P31751        |
| L2    | Q05655        | E7    | P32969        |
| L2    | Q13164        | E7    | P34947        |
| L2    | Q13177        | E7    | P35398        |
| L2    | Q13188        | E7    | P35998        |
| L2    | Q13464        | E7    | P36955        |
| L2    | Q13976        | E7    | P37231        |
| L2    | Q14164        | E7    | P38398        |
| L2    | Q14974        | E7    | P38936        |
| L2    | Q15746        | E7    | P39060        |
| L2    | Q15759        | E7    | P41743        |
| L2    | Q15831        | E7    | P42025        |
| L2    | Q16566        | E7    | P42684        |
| L2    | Q16659        | E7    | P45983        |
| L2    | Q5S007        | E7    | P45984        |
| L2    | Q5VST9        | E7    | P46100        |
| L2    | Q5VT25        | E7    | P46459        |
| L2    | Q6P0Q8        | E7    | P46527        |
| L2    | Q7KZI7        | E7    | P46734        |
| L2    | Q7L7X3        | E7    | P48729        |
| L2    | Q8TAE8        | E7    | P49116        |
| L2    | Q8TD19        | E7    | P49137        |
| L2    | Q8WYB5        | E7    | P49411        |
| L2    | Q92993        | E7    | P49759        |
| L2    | Q96BR1        | E7    | P49760        |
| L2    | Q96EK4        | E7    | P49840        |
| L2    | Q96GD4        | E7    | P49841        |

| HPV16 | HUMAN PROTEIN | HPV16 | HUMAN PROTEIN |
|-------|---------------|-------|---------------|
| L2    | Q96J92        | E7    | P50613        |
| L2    | Q96RU7        | E7    | P50750        |
| L2    | Q9BYP7        | E7    | P51784        |
| L2    | Q9GZM7        | E7    | P51812        |
| L2    | Q9H2G2        | E7    | P51955        |
| L2    | Q9H2K8        | E7    | P52564        |
| L2    | Q9HBE1        | E7    | P53667        |
| L2    | Q9HBH9        | E7    | P55055        |
| L2    | Q9HC98        | E7    | P55072        |
| L2    | Q9P286        | E7    | P56524        |
| L2    | Q9UBS0        | E7    | P60709        |
| L2    | Q9UEW8        | E7    | P60763        |
| L2    | Q9UHD2        | E7    | P60953        |
| L2    | Q9UKE5        | E7    | P61006        |
| L2    | Q9Y4K4        | E7    | P61026        |
| L2    | Q9Y5S2        | E7    | P61106        |
| L2    | Q9Y679        | E7    | P61158        |
| E1    | O14745        | E7    | P61160        |
| E1    | O75970        | E7    | P61163        |
| E1    | P62191        | E7    | P61586        |
| E1    | P62333        | E7    | P62136        |
| E1    | P62837        | E7    | P62191        |
| E1    | P63279        | E7    | P62333        |
| E1    | P68036        | E7    | P62736        |
| E1    | P78352        | E7    | P62826        |
| E1    | Q07157        | E7    | P62834        |
| E1    | Q12923        | E7    | P62837        |
| E1    | Q12959        | E7    | P63000        |
| E1    | Q14005        | E7    | P63261        |
| E1    | Q15599        | E7    | P63279        |
| E1    | Q15645        | E7    | P67775        |
| E1    | Q86UL8        | E7    | P68032        |
| E1    | Q96SB3        | E7    | P68036        |
| E2    | O00505        | E7    | P68104        |
| E2    | O14727        | E7    | P68371        |
| E2    | O15164        | E7    | P68400        |
| E2    | O15350        | E7    | P78396        |
| E2    | O15519        | E7    | P79483        |
| E2    | O43172        | E7    | P84095        |
| E2    | O43815        | E7    | P98082        |
| E2    | O60885        | E7    | Q00534        |
| E2    | O60907        | E7    | Q00535        |

| HPV16 | HUMAN PROTEIN | HPV16 | HUMAN PROTEIN |
|-------|---------------|-------|---------------|
| E2    | O95235        | E7    | Q00978        |
| E2    | P04150        | E7    | Q01094        |
| E2    | P04637        | E7    | Q01860        |
| E2    | P06401        | E7    | Q02750        |
| E2    | P08047        | E7    | Q03468        |
| E2    | P08235        | E7    | Q03518        |
| E2    | P09017        | E7    | Q04759        |
| E2    | P10275        | E7    | Q04864        |
| E2    | P10276        | E7    | Q05513        |
| E2    | P10827        | E7    | Q05655        |
| E2    | P10828        | E7    | Q07869        |
| E2    | P11387        | E7    | Q08050        |
| E2    | P17676        | E7    | Q08117        |
| E2    | P19793        | E7    | Q08209        |
| E2    | P20226        | E7    | Q08881        |
| E2    | P21675        | E7    | Q08999        |
| E2    | P22736        | E7    | Q09472        |
| E2    | P37231        | E7    | Q12778        |
| E2    | P43034        | E7    | Q12830        |
| E2    | P49116        | E7    | Q12873        |
| E2    | P53618        | E7    | Q13105        |
| E2    | P53621        | E7    | Q13153        |
| E2    | P54368        | E7    | Q13164        |
| E2    | P56537        | E7    | Q13177        |
| E2    | P62873        | E7    | Q13188        |
| E2    | P62879        | E7    | Q13217        |
| E2    | P63244        | E7    | Q13285        |
| E2    | P63279        | E7    | Q13309        |
| E2    | Q00987        | E7    | Q13464        |
| E2    | Q04724        | E7    | Q13478        |
| E2    | Q07666        | E7    | Q13489        |
| E2    | Q07869        | E7    | Q13523        |
| E2    | Q07955        | E7    | Q13547        |
| E2    | Q09472        | E7    | Q13554        |
| E2    | Q12830        | E7    | Q13555        |
| E2    | Q13243        | E7    | Q13573        |
| E2    | Q13285        | E7    | Q13618        |
| E2    | Q15637        | E7    | Q13627        |
| E2    | Q16637        | E7    | Q13813        |
| E2    | Q8TD31        | E7    | Q13895        |
| E2    | Q92793        | E7    | Q13976        |
| E2    | Q92830        | E7    | Q14188        |

| HPV16 | HUMAN PROTEIN | HPV16 | HUMAN PROTEIN |
|-------|---------------|-------|---------------|
| E2    | Q92831        | E7    | Q14192        |
| E2    | Q969H0        | E7    | Q14653        |
| E2    | Q96FC9        | E7    | Q14978        |
| E2    | Q96L91        | E7    | Q14980        |
| E2    | Q99697        | E7    | Q15139        |
| E2    | Q9BX70        | E7    | Q15329        |
| E2    | Q9BZK7        | E7    | Q15370        |
| E2    | Q9H0C5        | E7    | Q15418        |
| E2    | Q9UIF8        | E7    | Q15572        |
| E2    | Q9UKB1        | E7    | Q15645        |
| E2    | Q9UM11        | E7    | Q15669        |
| E2    | Q9Y297        | E7    | Q15746        |
| E2    | Q9Y570        | E7    | Q15788        |
| E6    | O00141        | E7    | Q15796        |
| E6    | O00220        | E7    | Q15797        |
| E6    | O00308        | E7    | Q15811        |
| E6    | O00487        | E7    | Q15831        |
| E6    | O14639        | E7    | Q16254        |
| E6    | O14640        | E7    | Q16520        |
| E6    | O14733        | E7    | Q16539        |
| E6    | O14746        | E7    | Q16644        |
| E6    | O14757        | E7    | Q16659        |
| E6    | O14763        | E7    | Q16665        |
| E6    | O14908        | E7    | Q5S007        |
| E6    | O14920        | E7    | Q5VST9        |
| E6    | O14936        | E7    | Q6P0Q8        |
| E6    | O14965        | E7    | Q71U36        |
| E6    | O15111        | E7    | Q7L099        |
| E6    | O15164        | E7    | Q7L0Q8        |
| E6    | O15350        | E7    | Q7L7X3        |
| E6    | O43166        | E7    | Q8N4C8        |
| E6    | O43294        | E7    | Q8N5A5        |
| E6    | O43318        | E7    | Q8NBS9        |
| E6    | O60674        | E7    | Q8TD19        |
| E6    | O60711        | E7    | Q8WYK2        |
| E6    | O75116        | E7    | Q92743        |
| E6    | O75528        | E7    | Q92753        |
| E6    | O75970        | E7    | Q92769        |
| E6    | O95071        | E7    | Q92793        |
| E6    | O95714        | E7    | Q92830        |
| E6    | P00519        | E7    | Q92831        |
| E6    | P01106        | E7    | Q92985        |

| HPV16 | HUMAN PROTEIN | HPV16 | HUMAN PROTEIN |
|-------|---------------|-------|---------------|
| E6    | P04198        | E7    | Q93008        |
| E6    | P04637        | E7    | Q93034        |
| E6    | P05129        | E7    | Q96B97        |
| E6    | P05771        | E7    | Q96CA5        |
| E6    | P07948        | E7    | Q96EY1        |
| E6    | P08138        | E7    | Q96GD4        |
| E6    | P10914        | E7    | Q96L33        |
| E6    | P12110        | E7    | Q96RG2        |
| E6    | P14778        | E7    | Q96T23        |
| E6    | P16591        | E7    | Q96TC7        |
| E6    | P17612        | E7    | Q9BX66        |
| E6    | P18887        | E7    | Q9BXR5        |
| E6    | P19438        | E7    | Q9BY41        |
| E6    | P19525        | E7    | Q9BZ95        |
| E6    | P21127        | E7    | Q9BZL6        |
| E6    | P21675        | E7    | Q9BZX2        |
| E6    | P21810        | E7    | Q9H2K8        |
| E6    | P22607        | E7    | Q9H2X6        |
| E6    | P22694        | E7    | Q9HAZ1        |
| E6    | P23142        | E7    | Q9HBH0        |
| E6    | P24941        | E7    | Q9HBH9        |
| E6    | P25098        | E7    | Q9HC98        |
| E6    | P25205        | E7    | Q9NRH3        |
| E6    | P25786        | E7    | Q9NRY4        |
| E6    | P26045        | E7    | Q9P289        |
| E6    | P29074        | E7    | Q9P2H0        |
| E6    | P29350        | E7    | Q9UBN7        |
| E6    | P29590        | E7    | Q9UIF8        |
| E6    | P29597        | E7    | Q9UJX6        |
| E6    | P31751        | E7    | Q9UK32        |
| E6    | P33993        | E7    | Q9UKE5        |
| E6    | P34947        | E7    | Q9UKV0        |
| E6    | P35241        | E7    | Q9ULU4        |
| E6    | P35555        | E7    | Q9UMD9        |
| E6    | P35998        | E7    | Q9UN37        |
| E6    | P36507        | E7    | Q9UQM7        |
| E6    | P38398        | E7    | Q9Y237        |
| E6    | P41240        | E7    | Q9Y3Z3        |
| E6    | P41743        | E7    | Q9Y4E8        |
| E6    | P42680        | E7    | Q9Y5K6        |
| E6    | P46531        | E7    | Q9Y6N5        |
| E6    | P46934        | E4    | P05783        |



| HPV16 | HUMAN PROTEIN | HPV16 | HUMAN PROTEIN |
|-------|---------------|-------|---------------|
| E6    | P46937        | E4    | P06493        |
| E6    | P49023        | E4    | P11802        |
| E6    | P49137        | E4    | P24941        |
| E6    | P49721        | E4    | P27361        |
| E6    | P49736        | E4    | P28482        |
| E6    | P49815        | E4    | P45983        |
| E6    | P50613        | E4    | P49759        |
| E6    | P51451        | E4    | P49760        |
| E6    | P51665        | E4    | P50613        |
| E6    | P51888        | E4    | P78362        |
| E6    | P51955        | E4    | Q00534        |
| E6    | P52292        | E4    | Q00535        |
| E6    | P52294        | E4    | Q13523        |
| E6    | P52943        | E4    | Q15746        |
| E6    | P53667        | E4    | Q16539        |
| E6    | P60900        | E4    | Q96SB4        |
| E6    | P62191        | E4    | Q9H2X6        |
| E6    | P62333        | E4    | Q9HAZ1        |
| E6    | P63279        | E5    | O00141        |
| E6    | P78352        | E5    | O00483        |
| E6    | P78504        | E5    | O14733        |
| E6    | P98095        | E5    | O14757        |
| E6    | Q00978        | E5    | O14787        |
| E6    | Q02750        | E5    | O14920        |
| E6    | Q02763        | E5    | O14965        |
| E6    | Q02779        | E5    | O15111        |
| E6    | Q04721        | E5    | O15260        |
| E6    | Q04759        | E5    | O15533        |
| E6    | Q05086        | E5    | O43292        |
| E6    | Q05209        | E5    | O43318        |
| E6    | Q05513        | E5    | O43353        |
| E6    | Q05655        | E5    | O60674        |
| E6    | Q06124        | E5    | O95819        |
| E6    | Q07157        | E5    | P00403        |
| E6    | Q07812        | E5    | P00519        |
| E6    | Q07817        | E5    | P00533        |
| E6    | Q07820        | E5    | P01100        |
| E6    | Q09013        | E5    | P01889        |
| E6    | Q09472        | E5    | P01891        |
| E6    | Q12805        | E5    | P01903        |
| E6    | Q12830        | E5    | P01911        |
| E6    | Q12923        | E5    | P01912        |

| HPV16 | HUMAN PROTEIN | HPV16 | HUMAN PROTEIN |
|-------|---------------|-------|---------------|
| E6    | Q12959        | E5    | P04440        |
| E6    | Q13153        | E5    | P04626        |
| E6    | Q13158        | E5    | P04844        |
| E6    | Q13177        | E5    | P05023        |
| E6    | Q13188        | E5    | P05129        |
| E6    | Q13227        | E5    | P05412        |
| E6    | Q13424        | E5    | P05556        |
| E6    | Q13464        | E5    | P05771        |
| E6    | Q13478        | E5    | P06213        |
| E6    | Q13554        | E5    | P06239        |
| E6    | Q13555        | E5    | P06241        |
| E6    | Q13642        | E5    | P06493        |
| E6    | Q13976        | E5    | P07093        |
| E6    | Q14005        | E5    | P07333        |
| E6    | Q14160        | E5    | P07947        |
| E6    | Q14192        | E5    | P07948        |
| E6    | Q14257        | E5    | P07949        |
| E6    | Q14653        | E5    | P08172        |
| E6    | Q14790        | E5    | P08195        |
| E6    | Q14974        | E5    | P09619        |
| E6    | Q15139        | E5    | P09769        |
| E6    | Q15349        | E5    | P11166        |
| E6    | Q15418        | E5    | P11717        |
| E6    | Q15599        | E5    | P11802        |
| E6    | Q15746        | E5    | P12931        |
| E6    | Q15831        | E5    | P13762        |
| E6    | Q15942        | E5    | P16070        |
| E6    | Q16512        | E5    | P16234        |
| E6    | Q16611        | E5    | P16591        |
| E6    | Q16644        | E5    | P16615        |
| E6    | Q5S007        | E5    | P17302        |
| E6    | Q5TCQ9        | E5    | P17612        |
| E6    | Q5VT25        | E5    | P18031        |
| E6    | Q684P5        | E5    | P19174        |
| E6    | Q6P0Q8        | E5    | P19525        |
| E6    | Q7L7X3        | E5    | P20036        |
| E6    | Q86UL8        | E5    | P21860        |
| E6    | Q8IX03        | E5    | P22607        |
| E6    | Q8N2W9        | E5    | P22681        |
| E6    | Q8N4C8        | E5    | P22694        |
| E6    | Q8TBB1        | E5    | P23458        |
| E6    | Q8TD19        | E5    | P23634        |

| HPV16 | HUMAN PROTEIN | HPV16 | HUMAN PROTEIN |
|-------|---------------|-------|---------------|
| E6    | Q8WTS6        | E5    | P24941        |
| E6    | Q92585        | E5    | P25116        |
| E6    | Q92793        | E5    | P27105        |
| E6    | Q92796        | E5    | P27361        |
| E6    | Q92985        | E5    | P27449        |
| E6    | Q96GD4        | E5    | P27824        |
| E6    | Q96J02        | E5    | P28482        |
| E6    | Q96JN8        | E5    | P29317        |
| E6    | Q96PU5        | E5    | P29323        |
| E6    | Q96QZ7        | E5    | P30101        |
| E6    | Q96RG2        | E5    | P30511        |
| E6    | Q96SB3        | E5    | P30530        |
| E6    | Q99435        | E5    | P35354        |
| E6    | Q99460        | E5    | P35968        |
| E6    | Q99466        | E5    | P36507        |
| E6    | Q99873        | E5    | P38936        |
| E6    | Q9BXR5        | E5    | P39656        |
| E6    | Q9BZL6        | E5    | P41240        |
| E6    | Q9H0M0        | E5    | P41743        |
| E6    | Q9H2K8        | E5    | P42166        |
| E6    | Q9H2X6        | E5    | P42167        |
| E6    | Q9H3D4        | E5    | P42679        |
| E6    | Q9H4G0        | E5    | P42680        |
| E6    | Q9HBX9        | E5    | P43403        |
| E6    | Q9HBY8        | E5    | P43405        |
| E6    | Q9HC98        | E5    | P46527        |
| E6    | Q9HD26        | E5    | P46778        |
| E6    | Q9NQC7        | E5    | P46977        |
| E6    | Q9NRM7        | E5    | P48047        |
| E6    | Q9NYK1        | E5    | P49841        |
| E6    | Q9P0J0        | E5    | P50402        |
| E6    | Q9P289        | E5    | P50416        |
| E6    | Q9UBN6        | E5    | P50613        |
| E6    | Q9UDY2        | E5    | P51451        |
| E6    | Q9UHV2        | E5    | P51571        |
| E6    | Q9UIF8        | E5    | P51572        |
| E6    | Q9UJA3        | E5    | P51955        |
| E6    | Q9UKE5        | E5    | P53621        |
| E6    | Q9ULJ8        | E5    | P53667        |
| E6    | Q9UNM6        | E5    | P57088        |
| E6    | Q9UPQ7        | E5    | P61803        |
| E6    | Q9UQM7        | E5    | P79483        |

| HPV16 | HUMAN PROTEIN | HPV16 | HUMAN PROTEIN |
|-------|---------------|-------|---------------|
| E6    | Q9Y2C9        | E5    | Q00535        |
| E6    | Q9Y2J2        | E5    | Q00765        |
| E6    | Q9Y2R2        | E5    | Q02750        |
| E6    | Q9Y2U5        | E5    | Q02779        |
| E6    | Q9Y4E8        | E5    | Q03518        |
| E6    | Q9Y6R4        | E5    | Q04759        |
| E7    | O00141        | E5    | Q04912        |
| E7    | O00602        | E5    | Q05397        |
| E7    | O14646        | E5    | Q05513        |
| E7    | O14733        | E5    | Q05655        |
| E7    | O14757        | E5    | Q06187        |
| E7    | O14829        | E5    | Q07812        |
| E7    | O14920        | E5    | Q08345        |
| E7    | O14936        | E5    | Q13153        |
| E7    | O14965        | E5    | Q13164        |
| E7    | O15111        | E5    | Q13177        |
| E7    | O15164        | E5    | Q13418        |
| E7    | O15304        | E5    | Q13563        |
| E7    | O15379        | E5    | Q13976        |
| E7    | O43318        | E5    | Q14289        |
| E7    | O43524        | E5    | Q15139        |
| E7    | O43586        | E5    | Q15165        |
| E7    | O43918        | E5    | Q15303        |
| E7    | O60229        | E5    | Q15418        |
| E7    | O60264        | E5    | Q15746        |
| E7    | O60341        | E5    | Q16288        |
| E7    | O60674        | E5    | Q16539        |
| E7    | O75116        | E5    | Q16620        |
| E7    | O75461        | E5    | Q16659        |
| E7    | O75962        | E5    | Q29980        |
| E7    | O95163        | E5    | Q5S007        |
| E7    | O95782        | E5    | Q6P0Q8        |
| E7    | O95819        | E5    | Q7L7X3        |
| E7    | O96017        | E5    | Q7Z434        |
| E7    | O96020        | E5    | Q8IV08        |
| E7    | O96028        | E5    | Q8N4C8        |
| E7    | P00505        | E5    | Q8TD19        |
| E7    | P00519        | E5    | Q96CS3        |
| E7    | P00749        | E5    | Q96J92        |
| E7    | P01019        | E5    | Q99442        |
| E7    | P01100        | E5    | Q99584        |
| E7    | P01106        | E5    | Q99623        |

| HPV16 | HUMAN PROTEIN | HPV16 | HUMAN PROTEIN |
|-------|---------------|-------|---------------|
| E7    | P01111        | E5    | Q9BYP7        |
| E7    | P01891        | E5    | Q9BZL6        |
| E7    | P01903        | E5    | Q9H2K8        |
| E7    | P01911        | E5    | Q9H2V7        |
| E7    | P01912        | E5    | Q9H490        |
| E7    | P02675        | E5    | Q9HBA0        |
| E7    | P04150        | E5    | Q9HC98        |
| E7    | P04350        | E5    | Q9HDC9        |
| E7    | P04440        | E5    | Q9NP72        |
| E7    | P05129        | E5    | Q9NQC3        |
| E7    | P05412        | E5    | Q9P289        |
| E7    | P05771        | E5    | Q9UI14        |
| E7    | P06239        | E5    | Q9UKE5        |
| E7    | P06241        | E5    | Q9UM73        |
| E7    | P06401        | E5    | Q9UNL2        |
| E7    | P06493        | E5    | Q9Y2U5        |
| E7    | P07384        | E5    | Q9Y572        |
| E7    | P07437        | E5    | Q9Y5M8        |
| E7    | P07900        | E5    | Q9Y6N5        |
| E7    | P07947        | E5    | Q9Y6R4        |
| E7    | P07948        |       |               |

## Matlab source code

```
%%%%%%%%%%%%%%%%%%%%%%%%%%%%%%%%%%%%%%%%%%%%%%%%%%%%%%%%%
```

```
%These codes have been tested in matlab2011a(win7 OS).
```

```
% The former three functions were named as key functions to calculated enrichment
```

```
% and PPC. The fourth function was used to map ROC curve and obtain AUC and
```

```
%AUPR. The other functions were called by key functions and didn't need the readers
```

```
% to call.
```

```
%%%%%%%%%%%%%%%%%%%%%%%%%%%%%%%%%%%%%%%%%%%%%%%%%%%%%%%%%
```

```
function [re_human,save_human,PPC]=Runmap_PPC(pathway_filename,...
```

```
inter_filename,map_human_id)
```

```
% Runmap_PPC.m            This code is used to calculate Pathway Participation
```

```
%                            Coefficient(PPC) of targeted human proteins
```

```
% Input:
```

```
% pathway_filename        File containing 224 different pathways which was
```

```
%                            downloaded from PID.
```

```
% inter_filename            File containing non-redundant interaction pairs of
```

```
%                            human proteins.
```

```
% map_human_id             The human proteins of calculating PPC
```

```
%Output:
```

```
% re_human                  The human protein which PPC cannot be calculated
```

```
% save_human                The human protein which PPC can be calculated
```

```
% PPC                        PPC of save_human
```

```

[corr_human,all_pathway]=getid_pathway(pathway_filename);

[left_inter,right_inter]=textread(inter_filename,'%s %s');

sub_id=intersect(map_human_id,corr_human);

[re_human,save_human]=getyong(sub_id,map_human_id);

uniq_human=unique(save_human);

onebound=size(uniq_human,1);

new_left_inter=[left_inter;right_inter];new_right_inter=[right_inter;left_inter];

[new_left_inter,vsort]=sort(new_left_inter);new_right_inter=new_right_inter(vsort,:);

[allhuman_id,startend]=getindex(new_left_inter);

%[all_pathway,vsort]=sort(all_pathway);corr_human=corr_huma%n(vsort,:);

part_PPC=zeros(onebound,1);

for ii=1:onebound

    look_human=uniq_human(ii);

    v=strcmp(look_human,allhuman_id);vindex=find(v==1);

    subindex=(startend(vindex,1):startend(vindex,2))';

    sub_protein=new_right_inter(subindex,:);

    [part_pathway,~]=getpathway(all_pathway,corr_human,sub_protein);

    [look_pathway,~]=getpathway(all_pathway,corr_human,look_human);

    [~,save_pathway]=getyong(look_pathway,part_pathway);

    part_PPC(ii,1)=getPPC(save_pathway);

end

PPC=DYCmap(save_human,uniq_human,part_PPC);

```

end

%%%%%%%%%%%%%%%%%%%%%%%%%%%%%%%%%%%%%%%%%%%%%%%%%%%%%%%%%

function all\_PPC=Runrandom\_PPC(pathway\_filename,inter\_filename, ...

map\_human\_id,count)

%Runrandom\_PPC.m            This code is used to calculate Pathway Participation

%                            Coefficient (PPC) of random human proteins

%Input:

%    The former three variables are similar to Runmap\_PPC.m

%    count                    Repetition times

%Output:

% all\_PPC                    PPC matrix

[corr\_human,all\_pathway]=getid\_pathway(pathway\_filename);

A=unique(corr\_human);B=numel(A);

[left\_inter,right\_inter]=textread(inter\_filename,'%s %s');

sub\_id=intersect(map\_human\_id,corr\_human);

[~,save\_human]=getyong(sub\_id,map\_human\_id);

uniq\_human=unique(save\_human);onebound=numel(uniq\_human);

new\_left\_inter=[left\_inter;right\_inter];new\_right\_inter=[right\_inter;left\_inter];

[new\_left\_inter,vsort]=sort(new\_left\_inter);new\_right\_inter=new\_right\_inter(vsort,:);

[allhuman\_id,startend]=getindex(new\_left\_inter);

all\_PPC=zeros(size(save\_human,1),count);



```

for jj=1:count

    random_count=randperm(B);random_count=random_count';

    part_random=random_count(1:onebound,:);part_human=A(part_random,:);

    part_PPC=zeros(onebound,1);

    for ii=1:onebound

        look_human=part_human(ii);

        v=strcmp(look_human,allhuman_id);vindex=find(v==1);

        subindex=(startend(vindex,1):startend(vindex,2))';

        sub_protein=new_right_inter(subindex,:);

        [part_pathway,~]=getpathway(all_pathway,corr_human,sub_protein);

        [look_pathway,~]=getpathway(all_pathway,corr_human,look_human);

        [~,save_pathway]=getyong(look_pathway,part_pathway);

        part_PPC(ii,1)=getPPC(save_pathway);

    end

    part_all_human=DYCMAP(save_human,uniq_human,part_human);

    all_PPC(:,jj)=DYCMAP(part_all_human,part_human,part_PPC);

end

end

%%%%%%%%%%%%%%%%%%%%%%%%%%%%%%%%%%%%%%%%%%%%%%%%%%%%%%%%%%%%%%%%%%%%%%%%

function [value_split,Etk,fisher]=Runall_enrichment(humanid,protein_id,degree,...

max_value,next_step,count)

% Runall_enrichment.m      This code is used to calculate repeatedly the

```

```

%                               enrichment of targeted human proteins

%Input:

%  humanid                       The human proteins of calculating enrichment
%  protein_id                     The all human protein in the integrated PPI network
%  degree                         The degree (betweenness) of protein_id
%  max_value                      The maximum of degree (betweenness)
%  next_step                      The count of logarithmic segmentation
%  count                          Repetition times

% Output:

%  value_split                   The number of logarithmic segmentation
%  Etk                           The enrichment of humanid
%  fisher                        The P value of fisher's exact test

all_Ntk=zeros(next_step,count);

all_Nrtk=zeros(next_step,count);all_fisher=zeros(next_step,count);

for ii=1:count

    [value_split,Ntk,Nrtk]=Runmap_enrichment(humanid,protein_id,degree,...
    max_value,next_step);

    fisher_p=getfisher(Ntk,Nrtk);

    all_fisher(:,ii)=fisher_p;

    all_Ntk(:,ii)=Ntk;

    all_Nrtk(:,ii)=Nrtk;

end

```

```

all_Etk=all_Ntk./all_Nrtk;

Etk=mean(all_Etk,2);

fisher=mean(all_fisher,2);

end

%%%%%%%%%%%%%%%%%%%%%%%%%%%%%%%%%%%%%%%%%%%%%%%%%%%%%%%%%%%%%%%%%%%%%%%%

function [AUC,AUPR,Acc]=ROCcompute(predictList,trueList,plotOption,...
split_value)

%ROCcompute.m          This code is used to map ROC curve and obtain AUC
                        and AUPR.
]%

%Input:

% predictList          Prediction score matrix or vector
% trueList             True labels
% plotOption           A switch whether plotting ROC or not, if plotOption=1,
%                       plotting ROC;

%Output:

% AUC                  The AUC value
% AUPR                 The AUPR value
% Acc                  The accuracy vector

if nargin==3

    split_value=size(predictList,1);

end

if size(predictList,2)>1

```

```

predictList=reshape(predictList,numel(predictList),1);

trueList=reshape(trueList,numel(trueList),1);

end

low=min(predictList);

high=max(predictList);

threshold=linspace(high,low,split_value);

Sen=zeros(1,split_value); Spe=zeros(1,split_value);

Pre=zeros(1,split_value);dottoline=0;

Acc=zeros(1,split_value);

for I=1:split_value

    Vector=zeros(numel(predictList),1);

    v=predictList>=threshold(I);Vector(v)=1;

    tp=sum(Vector==1&trueList==1);

    tn=sum(Vector==0&trueList==0);

    np=sum(Vector==1&trueList==0);

    nn=sum(Vector==0&trueList==1);

    Sen(I)=tp/(tp+nn);

    Spe(I)=tn/(tn+np);

```

```

if tp+np==0
    Pre(I)=1;
else
    Pre(I)=tp/(tp+np);
end

Acc(I)=(tn+tp)/(tn+tp+np+nn);
end

Sen=[0,Sen];Spe=[1,Spe];Pre=[1,Pre];

Acc=[sum(trueList==0)/length(trueList) Acc];

AUC=abs(trapz(1-Spe,Sen));
AUPR=abs(trapz(Sen,Pre));

if nargin==2
    plotOption=1;
end

if plotOption==1
    plot(1-Spe,Sen,'-','Color',[0.7176,0.5686,0.5647],'LineWidth',2.5);
    axis([-0.01 1.00 0 1.01]);
    xlabel('false positive rate');

```

```

ylabel('true positive rate');

figure;

plot(Sen,Pre,'-','Color',[0.7176,0.5686,0.5647],'LineWidth',2.5);

axis([0 1.01 0 1.01]);

xlabel('Sen');

ylabel('Pre');

end

%%%%%%%%%%%%%%%%%%%%%%%%%%%%%%%%%%%%%%%%%%%%%%%%%%%%%%%%%%%%%%%%%%%%%%%%

function [headers,remains]=getid_pathway(filename)

alllines=textread(filename,'%[^\n]');

onebound=numel(alllines);

headers=cell(onebound,1);remains=cell(onebound,1);

for ii=1:onebound

    headers{ii}=alllines{ii}(1:6);

    remains{ii}=alllines{ii}(end-5:end);

end

end

%%%%%%%%%%%%%%%%%%%%%%%%%%%%%%%%%%%%%%%%%%%%%%%%%%%%%%%%%%%%%%%%%%%%%%%%

function [re_human,save_human]=getyong(sub_id,map_human_id)

re_human=setdiff(map_human_id,sub_id);save_human={};

```

```

onebound=size(sub_id,1);

for ii=1:onebound

    v=strcmp(sub_id(ii),map_human_id);

    vindex=v==1;

    save_human=[save_human;map_human_id(vindex,:)];

end

end

%%%%%%%%%%%%%%%%%%%%%%%%%%%%%%%%%%%%%%%%%%%%%%%%%%%%%%%%%%%%%%%%%%%%%%%%

function [part_pathway,part_human]=getpathway(old_pathway,old_human,...

look_human)

onebound=size(look_human,1);

part_pathway={};part_human={};

for ii=1:onebound

    v=strcmp(look_human{ii},old_human);

    vindex=find(v==1);

    part_pathway=[part_pathway;old_pathway(vindex,:)];

    part_human=[part_human;old_human(vindex,:)];

end

end

%%%%%%%%%%%%%%%%%%%%%%%%%%%%%%%%%%%%%%%%%%%%%%%%%%%%%%%%%%%%%%%%%%%%%%%%

function part_PPC=getPPC(part_pathway)

```

```

[~,count]=getcount(part_pathway);

square_count=sum(count.^2);

sum_count=(sum(count)).^2;

part_PPC=square_count./sum_count;

end

%%%%%%%%%%%%%%%%%%%%%%%%%%%%%%%%%%%%%%%%%%%%%%%%%%%%%%%%%%%%%%%%%%%%%%%%

function fisher_p=getfisher(Ntk,Nrtk)

all_num=Ntk(1);

onebound=size(Ntk,1);

fisher_p=zeros(onebound,1);

for ii=1:onebound

    target_high_hub=Ntk(ii);non_high_hub=Nrtk(ii);

    fourth_table=[target_high_hub,all_num-target_high_hub;non_high_hub,...

    all_num-non_high_hub];

    p=FisherExtest[1](fourth_table);

    fisher_p(ii)=p;

end

end

%%%%%%%%%%%%%%%%%%%%%%%%%%%%%%%%%%%%%%%%%%%%%%%%%%%%%%%%%%%%%%%%%%%%%%%%

function [uniqueid,startend]=getindex(oldcolumn)

oldcolumn=sort(oldcolumn);

```



```
[uniqueid,index]=unique(oldcolumn);
```

```
vLen=index-[0;index(1:end-1,1)];
```

```
onebound=size(vLen,1);
```

```
startend=zeros(onebound,2);L=1;
```

```
for ii=1:onebound
```

```
    startend(ii,1)=L;
```

```
    startend(ii,2)=L+vLen(ii)-1;
```

```
    L=L+vLen(ii);
```

```
end
```

```
end
```

```
%%%%%%%%%%%%%%%%%%%%%%%%%%%%%%%%%%%%%%%%%%%%%%%%%%%%%%%%%
```

```
function [subid,count]=getcount(olddid)
```

```
sortid=sort(olddid);
```

```
[subid,index]=unique(sortid);
```

```
count=index-[0;index(1:end-1,1)];
```

```
end
```

```
%%%%%%%%%%%%%%%%%%%%%%%%%%%%%%%%%%%%%%%%%%%%%%%%%%%%%%%%%
```

```
function list2=DYCmap(list,origin,newcolumn)
```

```
[list,vSort]=sort(list);
```

```
[~,vRev]=sort(vSort);
```

```
[list,vEnd]=unique(list);
```

```
vLen=vEnd-[0;vEnd(1:end-1)];
```

```
[~,~,id]=intersect(list,origin);
```

```
V=zeros(sum(vLen),1);L=1;
```

```
for I=1:size(id,1)
```

```
    v=L:L+vLen(I)-1;
```

```
    V(v)=id(I);
```

```
    L=L+vLen(I);
```

```
end
```

```
V=V(vRev);
```

```
list2=newcolumn(V);
```

```
end
```

1. Thorvaldsen S, Flå T, Willassen NP: **DeltaProt: a software toolbox for comparative genomics.** *BMC Bioinform* 2010, **11**(1):573.
